# Supplementary material for: Towards European-scale convection-resolving climate simulations with GPUs: a study with COSMO 4.19
Source: Copernicus journal article supplement (doi:10.5194/gmd-9-3393-2016), 2016-09-21
Supplement: Supplementary file 1 [file gmd-9-3393-2016-supplement.pdf]

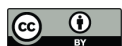

*Supplement of*

## **Towards European-scale convection-resolving climate simulations with GPUs: a study with COSMO 4.19**

**David Leutwyler et al.**

*Correspondence to:* David Leutwyler ([david.leutwyler@env.ethz.ch](mailto:david.leutwyler@env.ethz.ch))

The copyright of individual parts of the supplement might differ from the CC-BY 3.0 licence.

# 1 Supplement

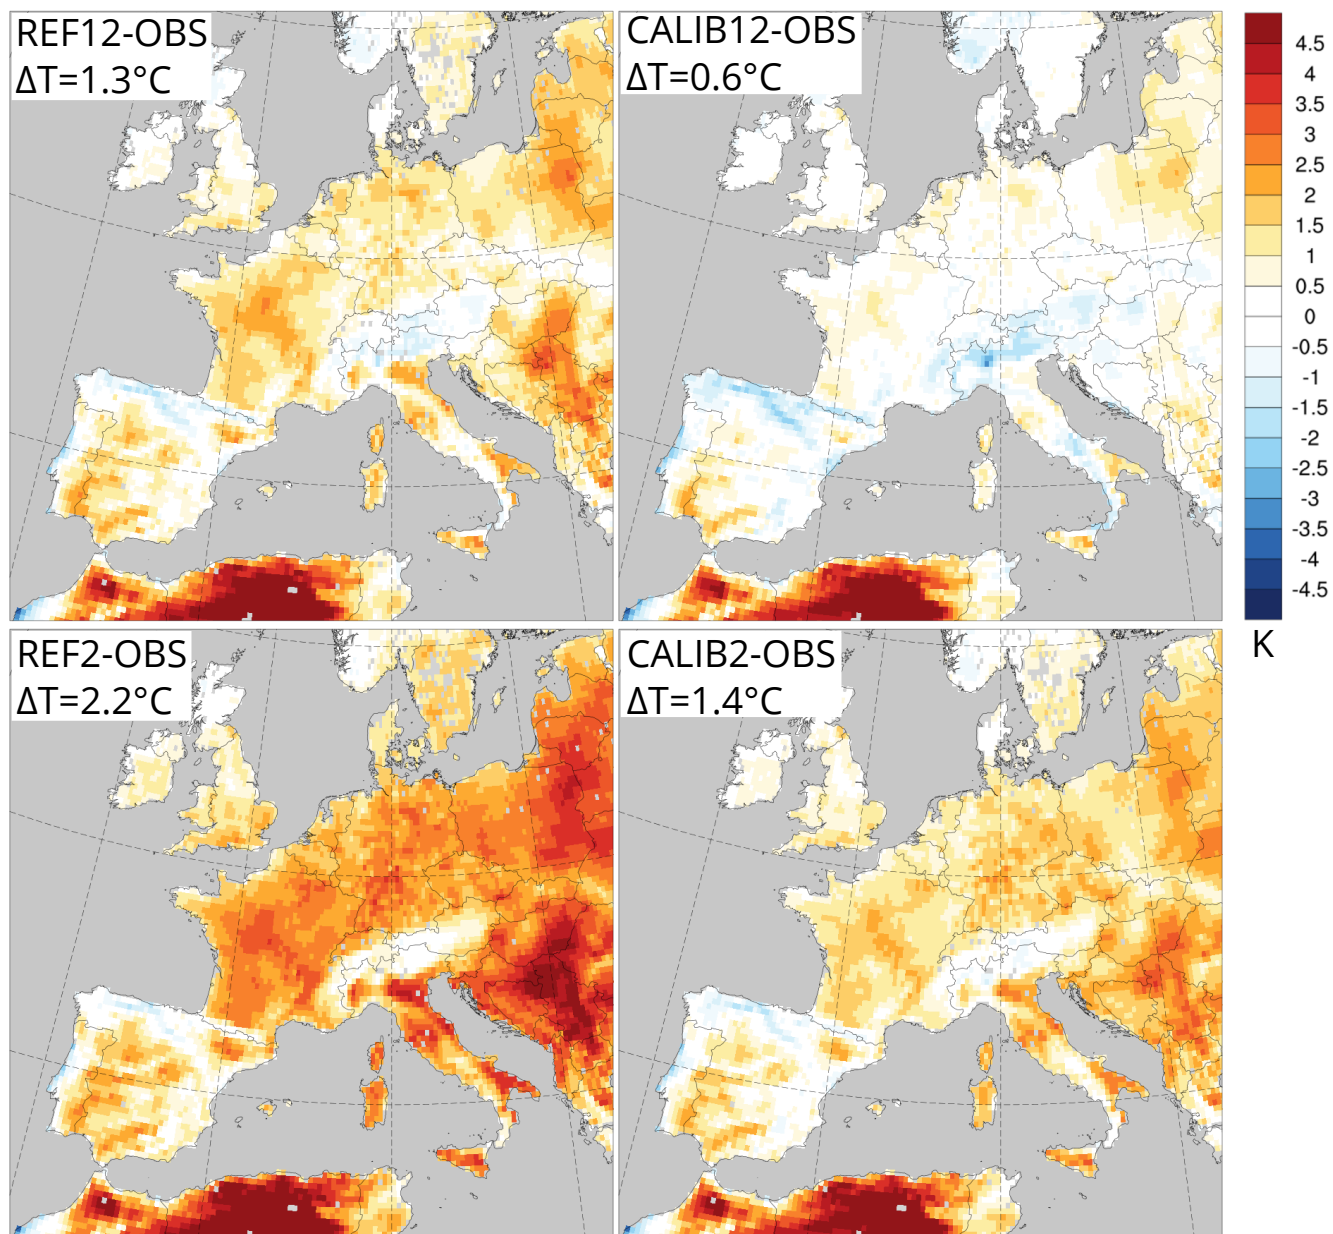

**Figure 1.** Seasonal mean temperature bias in summer 2006 [° K] relative to E-OBS observations (OBS). REF denotes the simulations following the calibration used by Ban et al. (2014) and CALIB the simulations following the calibration by Bellprat et al. (2016).

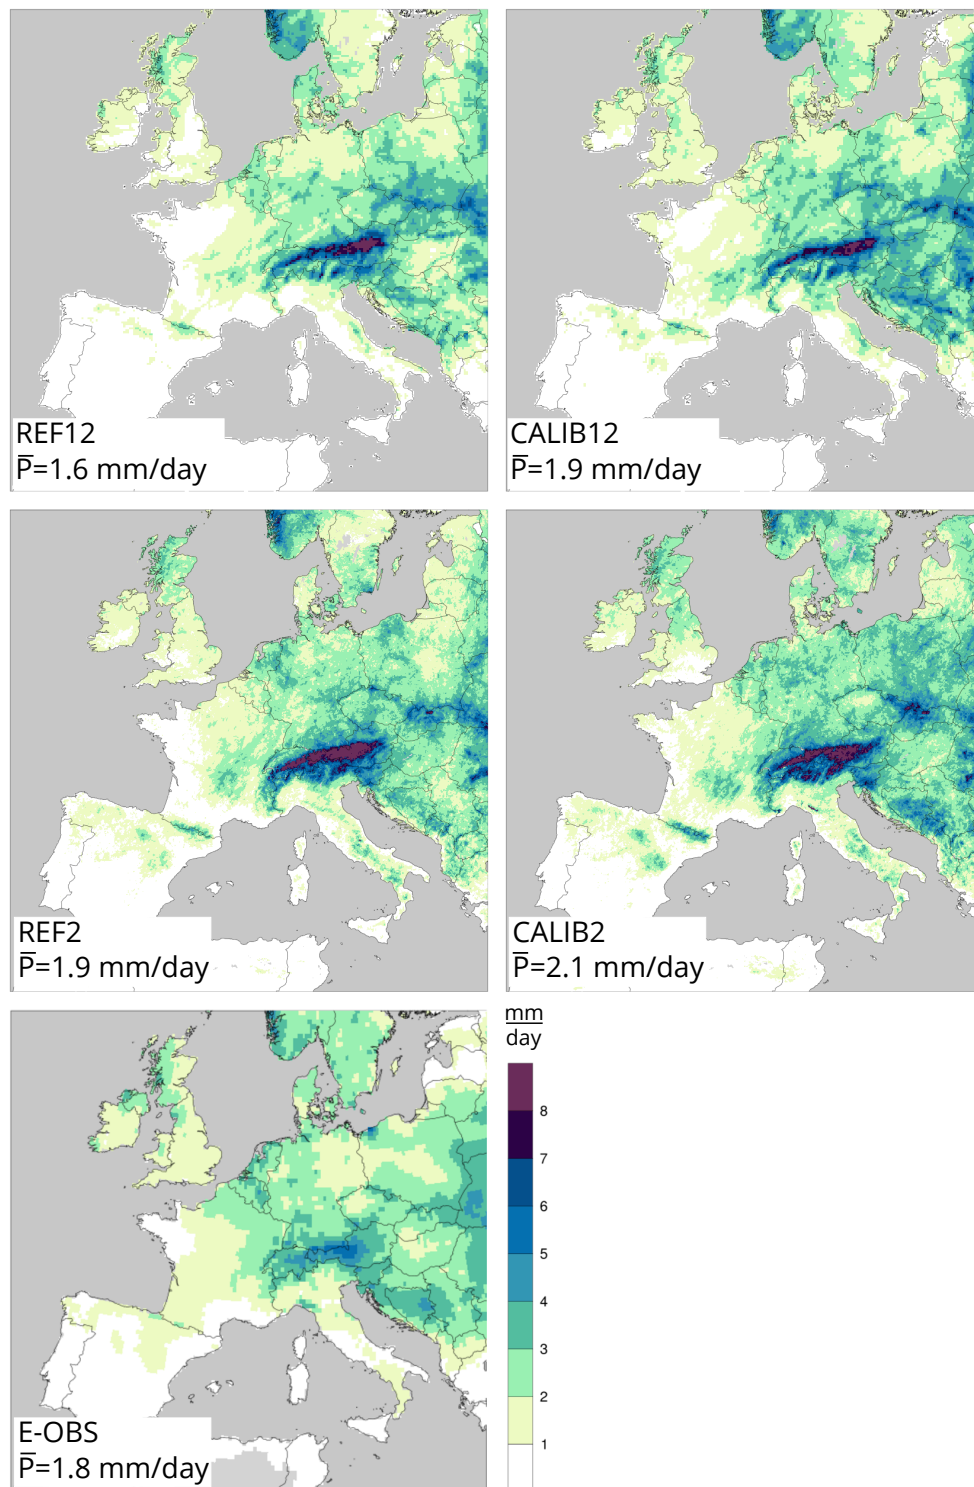

**Figure 2.** Seasonal mean precipitation in summer 2006 [mm/day] for simulations and E-OBS observations. REF denotes the simulations following the calibration used by Ban et al. (2014) and CALIB the simulations following the calibration by Bellprat et al. (2016).

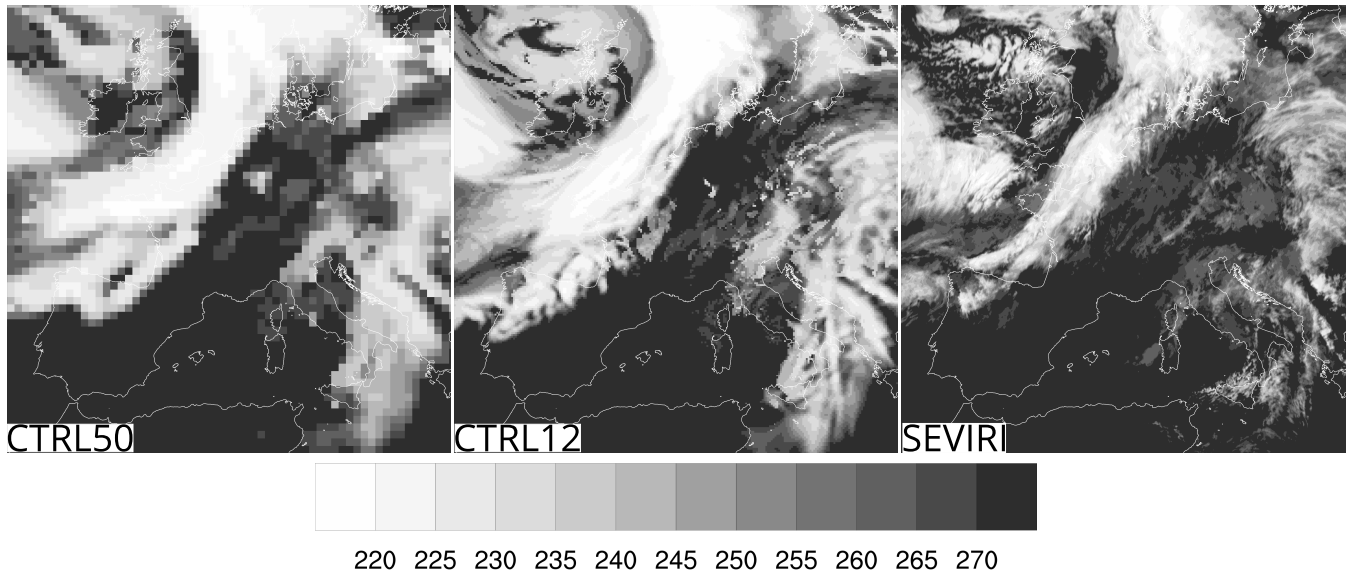

**Figure 3.** Synthetic brightness temperatures [K] computed by a satellite simulator (RTTOV) for (left) CTRL50, (middle) CTRL12 and (right) 10.8  $\mu\text{m}$  brightness temperatures from the Spinning Enhanced Visible and Infrared Imager (SEVIRI) on the geostationary Meteosat satellite. The synoptic situation shows a low-pressure system with a strong cold front on snapshots on 17 January 2007 12:00 UTC (same as Figure S4).



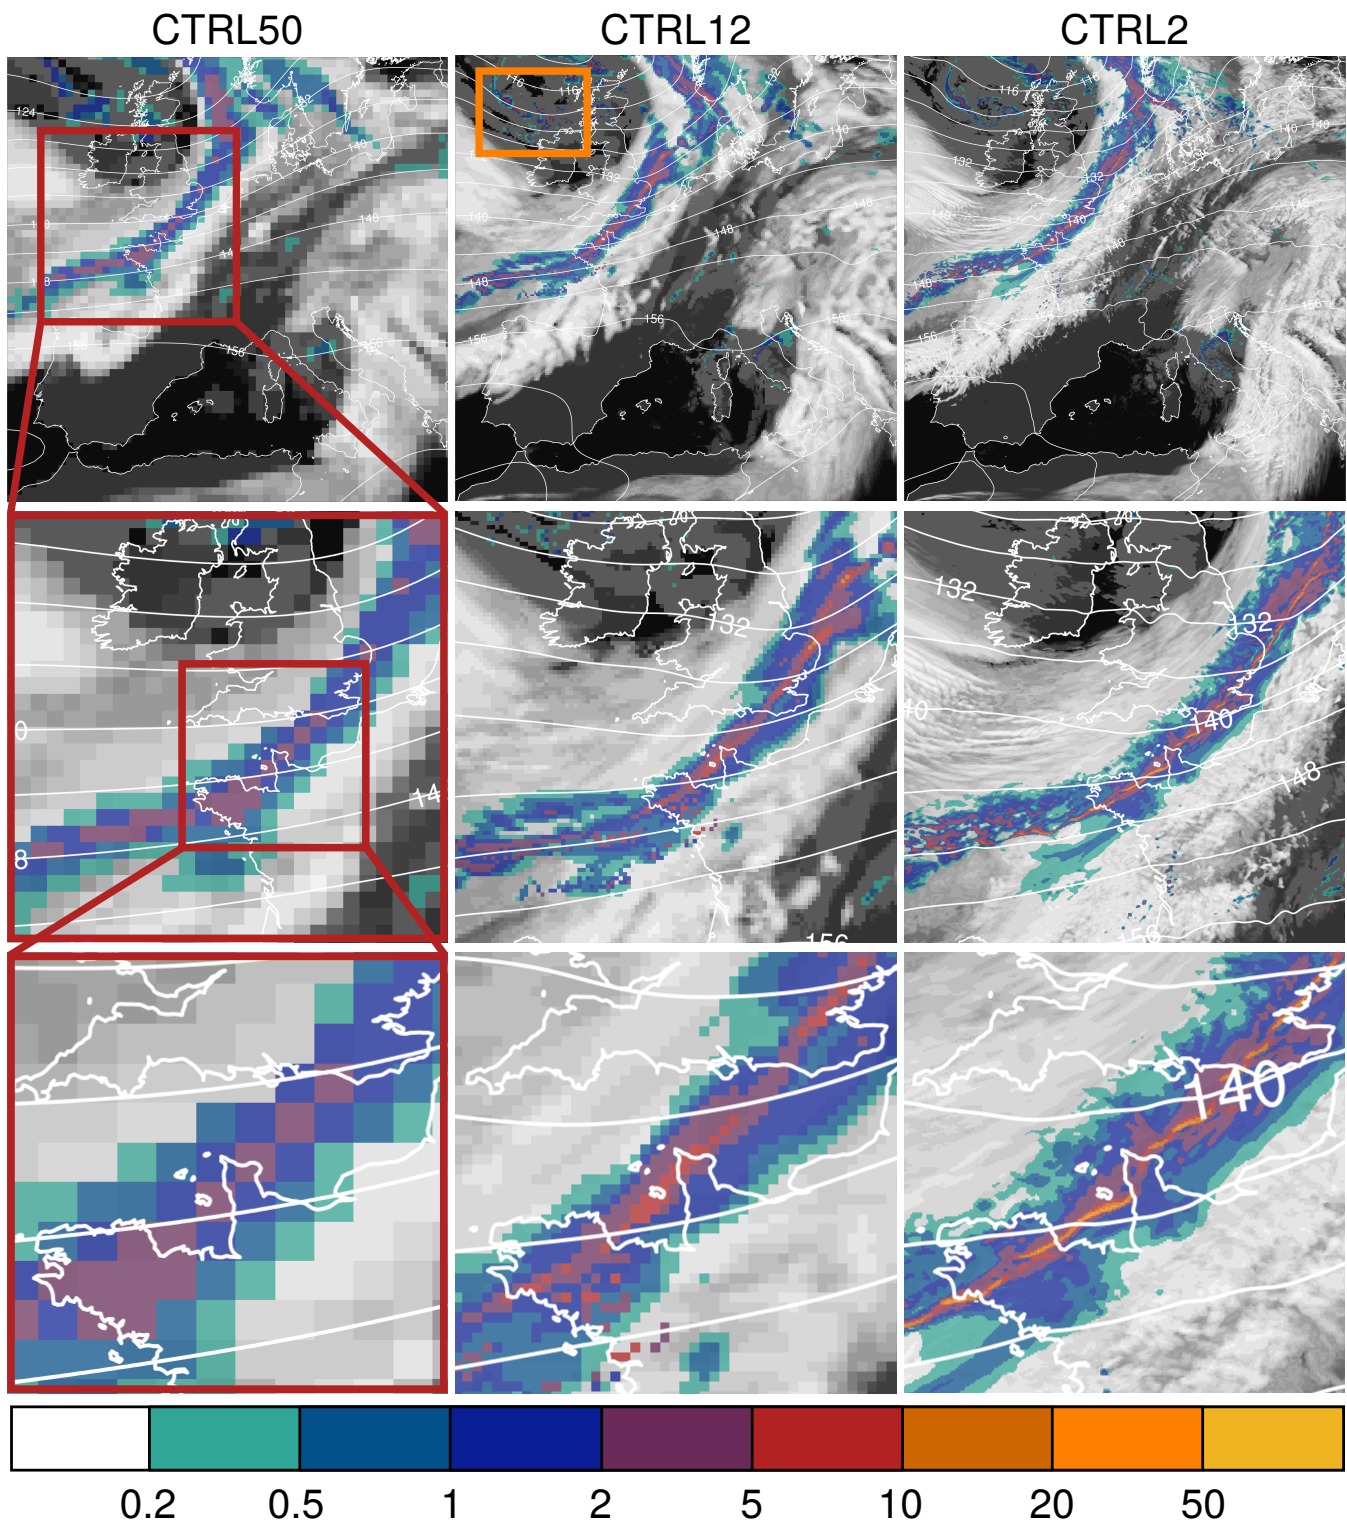

**Figure 4.** Snapshots of a cold-frontal passage on 17 January 2007 12 UTC. The colored shading indicates the rain-rate [mm/h], the white shading a cloud cover visualization (see section 2.4.1), and the white contours geopotential height at 850 hPa [gpm] using a contour line spacing of 4 gpm. (Left) CTRL50 simulation, (middle) CTRL12 simulation and (right) CTRL2 simulation. The red boxes in the left-hand column denote zoomed areas and the orange box denotes the zoomed area used in Figure 6.
